# Supplementary material for: Comparing Enhancer Action in Cis and in Trans
Source: Oxford University Press journal article supplement (doi:10.1534/genetics.112.140954), 2012-05-31
Supplement: sfigures2.pdf [file sfigures2.pdf]

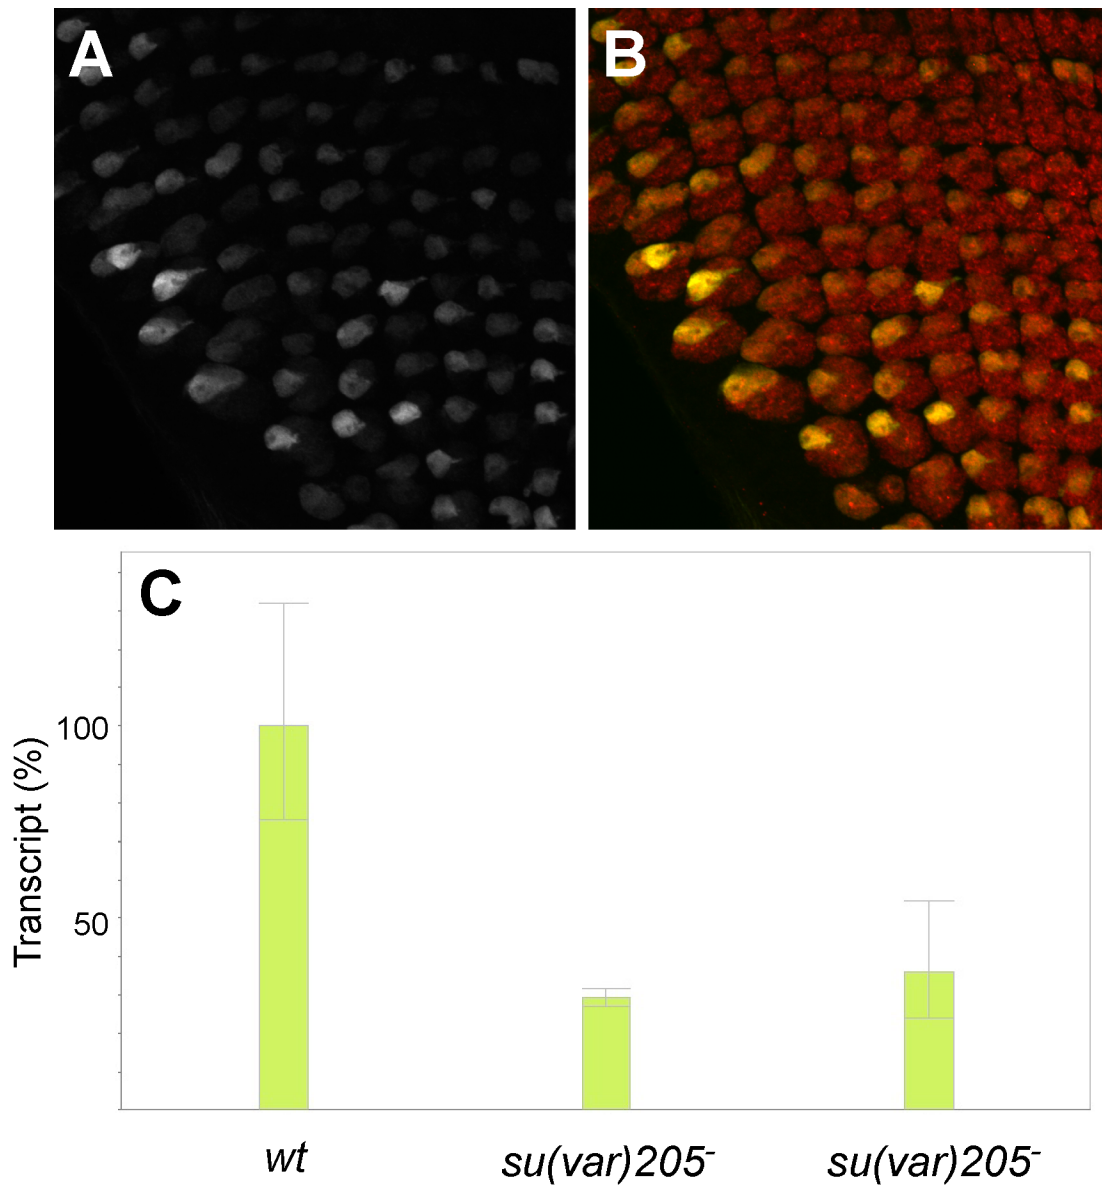

**Figure S2** Variegation of GMR action in *trans* is not sensitive to reduction in HP1. (A, B) Max-projected confocal z-stacks showing discs carrying Enhancerless and Promoterless constructs at 53F in a background where *Su(var)205* (encoding HP1) expression is reduced in the eye disc via the expression of a hairpin under the control of *ey-GAL4*. (A) anti-GFP staining only; (B) merged image showing GFP in green and anti-Elav staining in red. Flies carrying the hairpin P[TRiP.HMS00278] targeting *Su(var)205* were obtained from the Bloomington Drosophila Stock Center. (C) Quantitative RT-PCR on cDNA prepared from eye-antennal discs (see Materials and Methods) using primers *suvar205\_RT\_2F* (5'-CTGCTGGCGCGTCCTTGAGT-3') and *suvar205\_RT\_2R* (5'-CAGCAGTACGAGGCGAGCCG-3') targeting *Su(var)205* exonic sequences. "*wt*", genotype *Enhancerless/Promoterless* (defined as 100%); "*Su(var)205<sup>-</sup>*" genotype *Enhancerless/Promoterless; ey-GAL4/P[TRiP.HMS00278]*. Two independent *Su(var)205<sup>-</sup>* cDNA preparations derived from separate crosses show a reduction in *Su(var)205* mRNA levels to 29.2% (95% CI, 27.0-31.7%) and 36.1% (95% CI, 23.8-54.6%) relative to *wt*; note that this includes mRNA from the antennal portion of the eye-antennal disc where the hairpin is not expressed, and therefore likely represents an overestimate of transcript abundance in the eye disc. Although this represents a sizeable reduction in *Su(var)205* mRNA, we cannot exclude the possibility that HP1 protein levels are less significantly impacted by expression of the hairpin.
