# Supplementary material for: Comparing Enhancer Action in Cis and in Trans
Source: Oxford University Press journal article supplement (doi:10.1534/genetics.112.140954), 2012-05-31
Supplement: sfigures3.pdf [file sfigures3.pdf]

**37B**

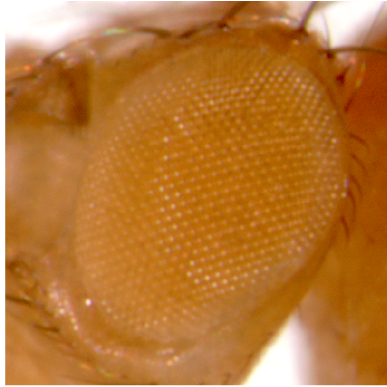

**38F**

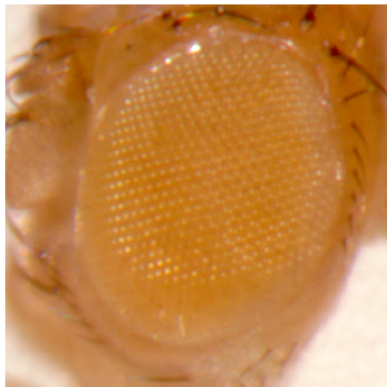

**53F**

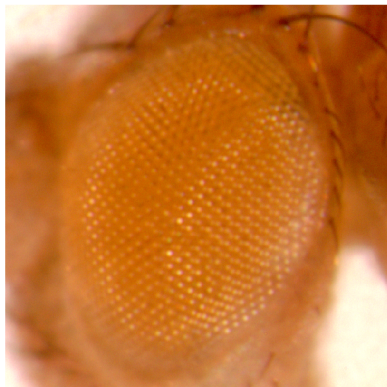

**Figure S3** Lack of variegation of *mini-white* expression from RMCE targets at 53F, 37B, or 38F. Each image represents a fly carrying a single copy of the P[attP.w+.attP] target cassette, which is marked with *mini-white*. No variegation is evident.
