# Supplementary material for: Comparing Enhancer Action in Cis and in Trans
Source: Oxford University Press journal article supplement (doi:10.1534/genetics.112.140954), 2012-05-31
Supplement: sfigures4.pdf [file sfigures4.pdf]

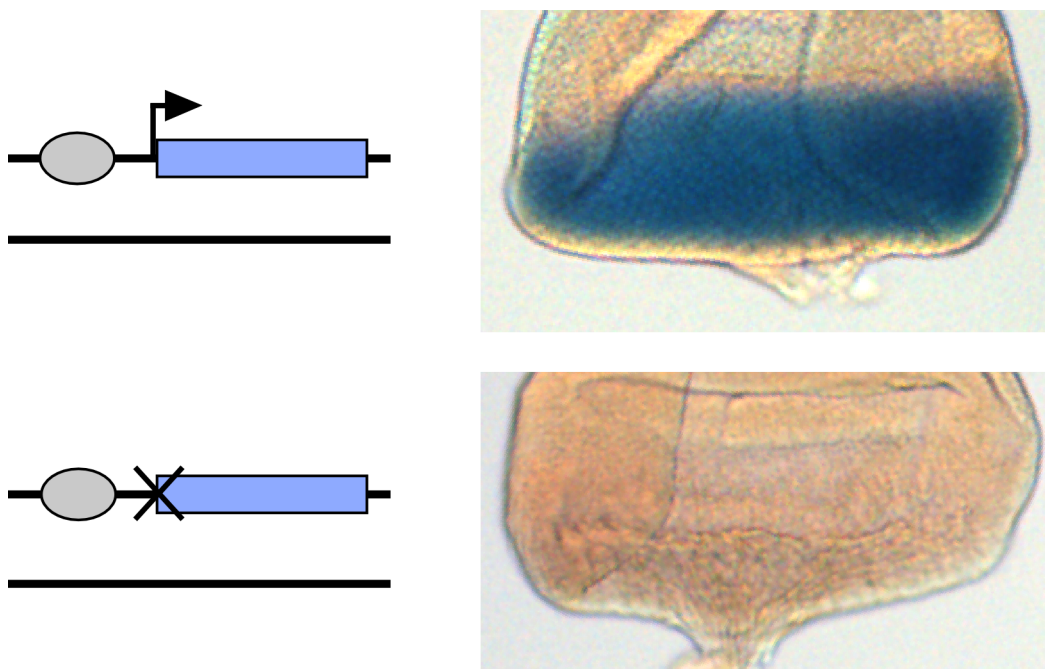

**Figure S4** Expression of *lacZ* in *cis*. X-gal stained discs carrying constructs Complete<sup>lacZ</sup> (top) or Promoterless (bottom) alone at 53F. In the top disc, the staining reaction was stopped after 20 minutes, whereas for the bottom disc, staining was carried out overnight. Quantitative RT-PCR indicates that expression from the Promoterless construct is <1% that of Complete<sup>lacZ</sup> (data not shown).
